# Supplementary material for: Influence of phase structure and morphology on the photocatalytic activity of bismuth molybdates
Source: Royal Society of Chemistry journal article supplement (doi:10.1039/c6ce00264a), 2016-01-01
Supplement: c6ce00264a1.pdf [file c6ce00264a1.pdf]

## Supporting Information for

# Influence of Phase Structure and Morphology on photocatalytic Activity of Bismuth Molybdates

*Daimei Chen<sup>1\*</sup>, Qiang Hao, Zhihong Wang<sup>1,2</sup>, Hao Ding<sup>1</sup>, Yongfa Zhu<sup>2\*</sup>*

(National Laboratory of Mineral Materials, School of Materials Sciences and  
Technology, China University of Geosciences, Beijing 100083, China <sup>1</sup>

<sup>2</sup>Department of Chemistry, Tsinghua University, Beijing, 100084, PR China)

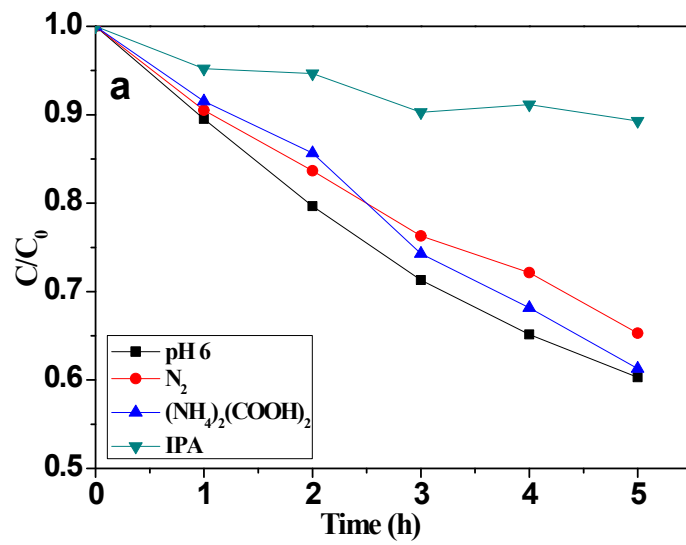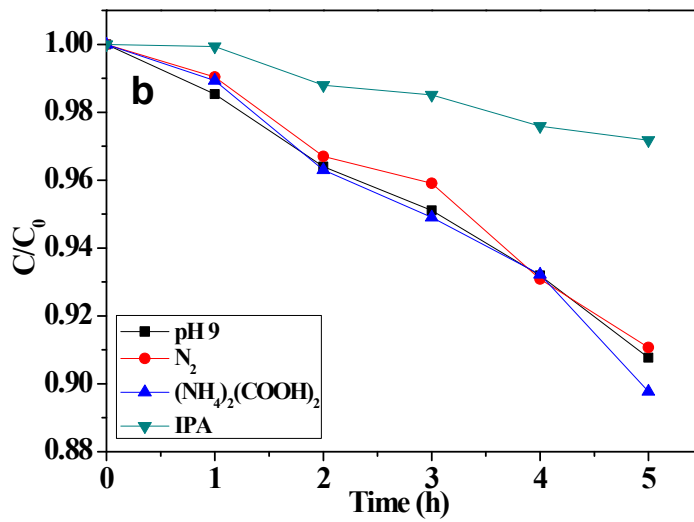

**Fig. S1.** Plots of photogenerated carriers trapping in the system of photodegradation of MO under visible light by (a) Bi<sub>2</sub>MoO<sub>6</sub> (pH=6) and (b) Bi<sub>3.64</sub>Mo<sub>0.36</sub>O<sub>6.55</sub> (pH=9).
